# Supplementary material
Source: PubMed Central journal article supplement (PMC7545529)
Supplement: Supplemental_Material2.pdf [file Supplemental_Material2.pdf]

## Appendix 2 – Summary of studies reporting TEA in inflammatory arthritis

| Study                                        | Study Design                         | Population                                                                           | Intervention (s)                                             | Results                                                                                                                                                                                                                                                                                                                                      |
|----------------------------------------------|--------------------------------------|--------------------------------------------------------------------------------------|--------------------------------------------------------------|----------------------------------------------------------------------------------------------------------------------------------------------------------------------------------------------------------------------------------------------------------------------------------------------------------------------------------------------|
| Pham et al. 2018 [13]<br><br>N=54            | Retrospective case series            | Mean Age 60 (29-83)<br><br>76% female<br><br>All RA                                  | Coonrad-Morrey (Zimmer, Warsaw, IN, USA)                     | Mean flexion 121° to 136°, Mean extension 42° to 23°<br><br>Mean MEPS 91 (55-100), QuickDASH 34 (0-75)<br><br>22% radiolucent lines<br><br>Complications 26%<br><br>13% revisions – 5.5% infection, 5.5% aseptic loosening, 2% ulna fracture<br><br>Survival 97% at 5 years and 85% at 10 years                                              |
| Ibrahim et al. 2017 [14]<br><br>N=7          | Retrospective case comparison series | Mean age 43.7 (34-50)<br><br>Juvenile idiopathic arthritis                           | Coonrad-Morrey (Zimmer, Warsaw, IN, USA)                     | Mean MEPS 31.4 (20-50) to 88 (80-100)<br>Complications 71.4%<br><br>2 revisions 28.6% - aseptic loosening<br>Survivorship was 5 year 100% and 10 years 69%                                                                                                                                                                                   |
| Hanninen et al. 2017 [15]<br><br>N=55        | Retrospective case series            | Mean age 57 (29-79)                                                                  | Discovery Elbow System (DES; Biomet Orthopedics, Warsaw, IN) | Mean flexion arc 91° to 122°<br><br>Mean MEPS - 93 (50-100), Mean DASH 43 (9-84)<br><br>15.4% Complications; Infection 10%, Ulna nerve palsy 5.4%<br>7.3% revisions – 5.4% aseptic loosening, 1.9% peri-prosthetic fracture                                                                                                                  |
| Sanchez Sotelo et al. 2016 [16]<br><br>N=435 | Prospective consecutive cohort       | Mean age 64 +/- 11 years<br>79% female<br><br>87% RA<br>13% RA and concurrent trauma | Coonrad-Morrey (Zimmer, Warsaw, IN, USA)                     | Mean flexion to 135° (50°-155°), Mean extension 20° (0-90°)<br><br>Mean MEPS 90 (80-100)<br><br>Complications; Intra-op fracture 4%, Nerve injury 0.2%, Triceps dysfunction 1%<br><br>Bushing wear 23%<br><br>Revision rate 11%; 9% mechanical failure and 2% infection<br>Survivorship 92% at 10 years, 83% at 15 years and 68% at 20 years |
| Mukka et al. 2015 [17]<br><br>N=25           | Prospective cohort study             | Mean age 64 (29-80)<br>84% female                                                    | Discovery Elbow System (DES; Biomet Orthopedics, Warsaw, IN) | Mean flexion arc from 88° to 113°<br>Mean QuickDash 66.5 to 40.2<br>Mean EQ-5D from 0.68 to 0.75<br><br>8% Complications; 4% ulna nerve entrapment and 4% triceps rupture<br>12% revisions; 4% aseptic loosening, 8% deep infection                                                                                                          |

|                                    |                           |                                                                                  |                                                                                                  |                                                                                                                                                                                                                                                                                                                                    |
|------------------------------------|---------------------------|----------------------------------------------------------------------------------|--------------------------------------------------------------------------------------------------|------------------------------------------------------------------------------------------------------------------------------------------------------------------------------------------------------------------------------------------------------------------------------------------------------------------------------------|
| Ogino et al. 2015 [18]<br>N=27     | Retrospective case series | Mean age 68.7 +/- 8.2<br>88% female                                              | Coonrad-Morrey (Zimmer, Warsaw, IN, USA)<br><br>Standard ulnar<br>N =20<br><br>Short ulnar n = 7 | Mean flexion arc<br>Standard group 87° to 116.1°<br>Shortened group 79° to 107.1°<br><br>MEPS<br>Standard group 50.3 to 94.2 Shortened group 56.5 to 90.8<br><br>Complications<br>Standard group 15%; 5% intra-op fracture, 5% wound problems, 5% infection<br>Shortened group 28.6%; 14.3% wound problems, 14.3% ulna nerve palsy |
| Baghdadi et al. 2014 [19]<br>N= 29 | Retrospective case series | Mean age 37 (24-68)<br>83% female                                                | Coonrad-Morrey (Zimmer, Warsaw, IN, USA)                                                         | Mean flexion arc improved from 66° +/- 44 to 89° +/- 35<br>Mean MEPS 78 (50-100)<br><br>Survivorship 96.4% and 79.9% at 5 and 10 years                                                                                                                                                                                             |
| Prasad et al. 2012 [20]<br>N=55    | Retrospective case series | Mean age 62 (37-81)<br>67% female                                                | Coonrad-Morrey (Zimmer, Warsaw, IN, USA)                                                         | Mean flexion arc 46°-98.5° to 32.6°-124.3°<br>Mean MEPS 80.9<br><br>30.9% Complications; 14.5% aseptic loosening, 5.5% intra-op fracture, 3.6% ulnar neuropathy, 5.5% stiffness, 1.8% infection                                                                                                                                    |
| Lee et al. 2005 [21]<br>N=8        | Retrospective case series | Mean age 56 (49 to 68)<br>87.5% Female<br><br>75% RA<br>25% Acute fracture in RA | Coonrad-Morrey (Zimmer, Warsaw, IN, USA)                                                         | Mean flexion arc 101.3° (70° to 120°)<br>Mean MEPS 93.1 (75-100)<br>12.5% Complications; intra-op fracture                                                                                                                                                                                                                         |
| Gill et al. 1998 [22]<br>N=78      | Retrospective case series | 72% female                                                                       | Coonrad-Morrey (Zimmer, Warsaw, IN, USA)                                                         | Mean flexion arc 90° to 103°<br><br>Mean MEPS from 42 to 87<br><br>14.1% Complications; 3.9% triceps avulsion, 3.9% intra-op fractures, 2.6% deep infections, 2.6% ulna fracture, 1.3% ulna component fracture<br><br>Revision 13%<br>Survival 94.4% at 5 years, 92.4% at 10 years                                                 |

RA – rheumatoid arthritis, ROM – range of motion, QuickDASH - Quick Disabilities of the Arm, Shoulder and Hand Score, MEPS – Mayo Elbow Performance score, DASH - Disabilities of the Arm, Shoulder and Hand Score.
