# Supplementary material
Source: PubMed Central journal article supplement (PMC7545529)
Supplement: Supplemental_Material5.pdf [file Supplemental_Material5.pdf]

## Appendix 5 – Summary of studies reporting TEA in miscellaneous indications

| Study                                     | Study Design                           | Population                                                                                  | Intervention (s)                                                                                                       | Follow up                      | Outcome                                              | Results                                                                                                                                                                                                                                                                                                                                                  |
|-------------------------------------------|----------------------------------------|---------------------------------------------------------------------------------------------|------------------------------------------------------------------------------------------------------------------------|--------------------------------|------------------------------------------------------|----------------------------------------------------------------------------------------------------------------------------------------------------------------------------------------------------------------------------------------------------------------------------------------------------------------------------------------------------------|
| Ernstbrunner et al. 2018 [40]<br><br>N=13 | Retrospective consecutive cohort study | Mean age 55 (39-76)<br><br>78% Type A and 22% type B haemophilia                            | Coonrad-Morrey (Zimmer, Warsaw, IN, USA)                                                                               | 109 months (60-144)            | ROM<br>MEPS<br>Complications<br>Revision             | Mean flexion arc 71° to 81°<br>Mean MEPS 64 +/- 16 to 89 +/- 11<br><br>62% Complications; 15.4% infection, 15.4% ulnar nerve neuropathy, 15.4% polyethylene wear, 7.7% compartment syndrome, 7.7% aseptic loosening<br><br>38% revisions; 15.4% infection, 15.4% polyethylene wear, 7.7% aseptic loosening<br>Survivorship 92% and 42% at 5 and 10 years |
| Schoch et al. 2017 [76]<br><br>N =18      | Prospective case series                | Mean age 68 (51-85)<br>62% female<br>Primary OA                                             | 78% Coonrad-Morrey<br>17% Latitude                                                                                     | Mean FU 8.9 years (2-20 years) | ROM<br>MEPS<br>Complications<br>Revision<br>Survival | Mean flexion arc 87° to 105°<br>MEPS 38% excellent, 15% good, 46% fair<br><br>50% Complications<br>11% revision; 5.5% infection and 5.5% periprosthetic fracture<br>10 year Implant survival 89.4%                                                                                                                                                       |
| Casadei et al. 2016 [41]<br><br>N =47     | Retrospective case series              | Mean age 40 (9-86)<br><br>Primary or metastatic tumor                                       | 25 modular prosthesis and 22 standard prosthesis<br><br>Standard prosthesis 86%<br>Coonrad-Morrey and Latitude 14%     | 35 months                      | MEPS<br>MSTS<br>Complications<br>Revision            | Mean MEP 84%<br>MSTS scores 22/30<br><br>29% Complications; 25% nerve injury, 4% infections<br><br>4.2% Revision; 2.1% infection, 2.1% cement extrusion                                                                                                                                                                                                  |
| Vochteloo et al. 2015 [42]<br><br>N=4     | Retrospective case series              | Mean age 58 (54-63)<br>50% female<br><br>50% type A haemophilia, 50% von Willebrand disease | Coonrad-Morrey (zimmer, Warsaw, IN, USA), n=3<br><br>Discovery Elbow System (DES; Biomet Orthopedics, Warsaw, IN), n=1 | 63.3 months (31-89)            | ROM<br>MEPS<br>Revision                              | Mean flexion arc 70° to 97.5°<br><br>Mean MEPS 40 to 91.5<br><br>0% Revisions                                                                                                                                                                                                                                                                            |
| Athwal et al. 2005 [43]                   | Retrospective case series              | Mean age 66 (38 to 83)<br>43% female                                                        | Coonrad-Morrey (Zimmer, Warsaw, IN, USA)                                                                               | 30 months (1 to 192)           | ROM<br>MEPS<br>Complications                         | Mean flexion arc 48° to 92°<br>Mean MEPS 22 (5 to 45) to 75 (55 to 95)<br>35% Complications; 25% nerve injury, 5% ulna                                                                                                                                                                                                                                   |

|      |  |                             |  |  |          |                                                                                                          |
|------|--|-----------------------------|--|--|----------|----------------------------------------------------------------------------------------------------------|
| N=21 |  | Primary or metastatic tumor |  |  | Revision | split fracture, 5% CRPS<br>20% Revision rate; 10% non-union, 5% ulna fracture, 5% above elbow amputation |
|------|--|-----------------------------|--|--|----------|----------------------------------------------------------------------------------------------------------|

RA – rheumatoid arthritis, ROM – range of motion, QuickDASH - Quick Disabilities of the Arm, Shoulder and Hand Score, MEPS – Mayo Elbow Performance score, DASH - Disabilities of the Arm, Shoulder and Hand Score, HO – heterotopic ossification, ASES – American Shoulder Elbow Society score, OES – Oxford Elbow Score, MSTs – Musculoskeletal Tumor Society Scoring.
